# Evidence for genetic modifiers of postnatal lethality in PWS-IC deletion mice

Stormy J. Chamberlain<sup>1,†</sup>, Karen A. Johnstone<sup>1</sup>, Amanda J. DuBose<sup>1</sup>, Thomas A. Simon<sup>1</sup>, Marisa S. Bartolomei<sup>2</sup>, James L. Resnick<sup>1,\*</sup> and Camilynn I. Brannan<sup>1,††</sup>

<sup>1</sup>Department of Molecular Genetics and Microbiology, University of Florida College of Medicine, Box 100266, Gainesville, FL 32610, USA and <sup>2</sup>Howard Hughes Medical Institute and Department of Cell and Developmental Biology, University of Pennsylvania School of Medicine, Philadelphia, PA 19104, USA

Received August 13, 2004; Revised and Accepted September 20, 2004

**Prader–Willi syndrome (PWS), most notably characterized by infantile hypotonia, short stature and morbid obesity, results from deficiencies in multiple genes that are subject to genomic imprinting. The usefulness of current mouse models of PWS has been limited by postnatal lethality in affected mice. Here, we report the survival of the PWS-imprinting center (IC) deletion mice on a variety of strain backgrounds. Expression analyses of the genes affected in the PWS region suggest that while there is low-level expression from both parental alleles in PWS-IC deletion pups, this expression does not explain their survival on certain strain backgrounds. Rather, the data provide evidence for strain-specific modifier genes that support the survival of PWS-IC deletion mice.**

## INTRODUCTION

Prader–Willi syndrome (PWS) is characterized by infantile hypotonia, gonadal hypoplasia, a moderate delay in physical and mental development, short stature, obsessive/compulsive behavior and neonatal feeding difficulties, later followed by hyperphagia which contributes to profound obesity (1). PWS is an imprinting disorder caused by loss of paternal gene expression from chromosome 15q11–q13. The predominant causes are paternal inheritance of a 4 Mb deletion of 15q11–q13 or maternal uniparental disomy (UPD) for chromosome 15 (2). A second neurobehavioral disorder, Angelman syndrome (AS), also maps to 15q11–q13 but is caused by the loss of maternal contribution (3). A small number of cases of both PWS and AS are due to imprinting defects. These can be caused by microdeletions involving the imprinting center (IC), which regulates imprinting across an ~2 Mb region (4). The IC has a bipartite structure, comprising the PWS-IC, located around exon 1 of *SNRPN* (5), and the AS-IC, located 35 kb upstream of *SNRPN* (6). No case of PWS has been attributed to a single gene defect, strongly suggesting that it is a contiguous gene syndrome (7). A number of paternally expressed PWS candidate genes have been identified, including *MKRN3* (8), *MAGEL2* (9),

*NDN* (10), *SNRPN* (11,12), *IPW* (13), a number of snoRNAs (HBII-436, HBII-13, HBII-437, HBII-438A, HBII-85, HBII-52 and HBII-438B) (14,15) and an antisense transcript to the *UBE3A* gene (16). Recent evidence suggests that *SNRPN*, the snoRNAs and the *UBE3A* antisense are products of a single transcriptional unit (17).

Both gene content and imprinting are conserved in a region of mouse chromosome 7C. The first mouse model of PWS to be reported was a model for UPD (18). Mice with maternal duplication of a region of chromosome 7 show poor feeding, failure to thrive and die between 2 and 8 days after birth. A model for PWS deletions arose fortuitously as a transgene-induced deletion of the PWS/AS orthologous region in mice (19). These mice are reported to have failure to thrive, feeding difficulties, reduced movement, irregular respiration and all die within 1 week of birth. We previously generated a model for PWS-IC deletions by targeted deletion of 35 kb (originally reported to be 42 kb) including 16 kb upstream of *Snrpn* and exons 1–6 (PWS-IC<sup>del</sup>) (20). Breeding male chimeric founders (129S1/Sv) harboring a maternal deletion mutation to wild-type females (C57BL/6J) resulted in mutant offspring that usually died within 48 h and never survived beyond 7 days after birth. These mice exhibited several phenotypes similar to those found in PWS infants, including

\*To whom correspondence should be addressed. Tel: +1 3523923258; Fax: +1 3523923133; Email: resnick@mgm.ufl.edu

†Present address: Department of Genetics, University of North Carolina at Chapel Hill, Chapel Hill, NC 27599, USA.

††Deceased.

poor feeding, failure to thrive and small size. In addition, the progeny lacked expression of the local paternally expressed genes *Mkrn3*, *Ndn* and *Ipw* (20), as well as *Mage12* (21), MBII-13, MBII-85 and MBII-52 (14). Additional mouse models have been employed to analyze the contribution of subsets or individual genes to PWS phenotypes. The most notable of these are a deletion from *Snrpn* to *Ube3a*, which results in hypotonia, growth retardation and 80% postnatal lethality (22), and deletion of *Ndn*, which presents with variable phenotype (see Discussion), but two reports identify substantial postnatal lethality in *Ndn*-deficient mice (23–25).

The phenotypes consistently reported in mouse models of PWS include feeding difficulties, failure to thrive and growth deficiency. These phenotypes are also evident in PWS infants. However, the usefulness of mouse models to study later onset obesity and behavioral phenotypes has been limited by the 100% postnatal lethality observed in the deletion, UPD and PWS-IC deletion models. Here, we report survival of PWS-IC<sup>del</sup> mice dependent upon maternal strain. Surviving PWS-IC<sup>del</sup> mice still present with failure to thrive and growth deficiency, but display a strain-dependent reduction in postnatal lethality. We also present evidence for the existence of a modifier locus that is dependent on the maternal strain.

## RESULTS

### Survival of PWS-IC<sup>+del</sup> mice is strain-dependent

In contrast to the fully penetrant neonatal lethality phenotype observed in crosses with wild-type C57BL/6J females, crosses between wild-type female FVB/NJ mice and PWS-IC<sup>del</sup> carrier males (on both 129S1/Sv and C57BL/6J backgrounds) produced several mutant offspring that survived to 2 weeks of age. Furthermore, offspring inheriting the PWS-IC<sup>del</sup> allele paternally (PWS-IC<sup>+del</sup>), could survive to adulthood if most of the wild-type competitor sibs were removed. Although surviving PWS-IC<sup>+del</sup> mice are significantly smaller than wild-type sibs (Fig. 1), both males and females are fertile and never become obese on a standard diet (~9% fat).

To determine whether survival is due to superior mothering by FVB/NJ females as compared with C57BL/6J females, newborn pups were fostered to mothers of the opposite strain. In addition, an FVB/NJ female and a C57BL/6J female were set up in a trio mating with a heterozygous PWS-IC<sup>del</sup> male. In either case, only PWS-IC<sup>+del</sup> mice born to FVB/NJ females survived, demonstrating that survival is a consequence of the genetic background of either the offspring or the mother and does not result from superior mothering skills (data not shown).

Females from several strains (C57BL/6J, FVB/NJ, C3H/HeJ, BALB/cJ, 129S1/Sv and DBA/2J) were mated to C57BL/6J PWS-IC<sup>del/+</sup> males to determine whether survival was restricted to offspring of the FVB/NJ strain. In each case, all but one of the wild-type littermates were removed from the litters within two days of birth and the survival of PWS-IC<sup>+del</sup> pups was monitored. Pups born to C57BL/6J or DBA/2J females had the shortest survival time, with the longest surviving affected individual from either strain living only for 7 days. Mothers of all other strains produced at

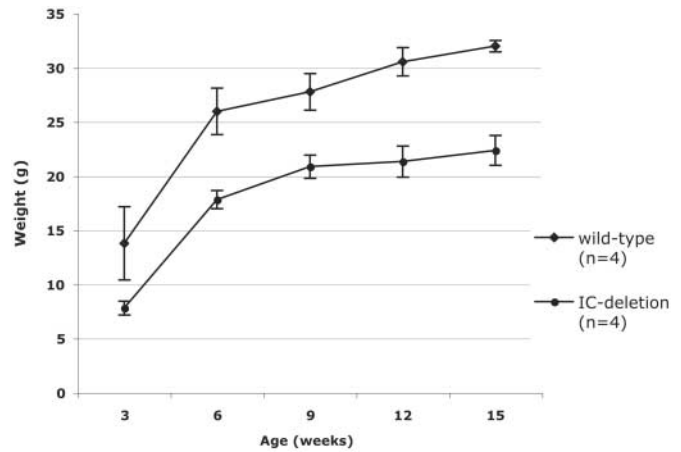

**Figure 1.** Surviving PWS-IC<sup>+del</sup> mice are smaller than their wild-type littermates. PWS-IC<sup>+del</sup> (IC-deletion) and wild-type male (FVB/N × C57BL/6J)F<sub>1</sub> mice were weighed at 3, 6, 9, 12 and 15 weeks of age.

least two affected pups that survived to 3 weeks of age (data not shown). PWS-IC<sup>+del</sup> mice on all strains displayed failure to thrive and weakness, and if death occurred it was generally within 14 days of birth. Almost all animals surviving for 14 days also survived to adulthood. (C57BL/6J × C3H/HeJ)F<sub>1</sub> and either (C57BL/6J × FVB/NJ)F<sub>1</sub> or (FVB/NJ × C57BL/6J)F<sub>1</sub> females were also mated with heterozygous PWS-IC<sup>del</sup> males to ascertain survival of PWS-IC<sup>+del</sup> pups from F<sub>1</sub> mothers. Similarly, all wild-type pups except one were culled within 2 days of birth. Both F<sub>1</sub> mothers produced offspring that survived to 3 weeks of age. However, when compared with FVB/NJ mothers, the rate of survival was considerably lower (Table 1). This further suggests that a genetic factor is involved in survival and that the C57BL/6J background is non-permissive.

### Incomplete silencing of PWS genes on all strain backgrounds

As PWS-IC<sup>+del</sup> offspring of FVB/NJ mothers survive with a high frequency, we sought to determine whether gene expression of imprinted genes was altered in surviving mice. (FVB/NJ × C57BL/6J)F<sub>1</sub> PWS-IC<sup>+del</sup> mice were sacrificed as neonates and at 1, 2 and 3 weeks of age. Expression of several PWS candidate genes in the brain was examined by northern blot and RT-PCR. While *Ndn* and *Snrpn* were not detectable by northern blot (data not shown), we detected expression of *Ndn* by RT-PCR (Fig. 2A). *Snrpn* expression was also evident, but at a very low level. Expression seemed to be variable between mutant offspring, perhaps because of the non-linear nature of PCR, and showed no correlation with age. Comparable low-level expression of the MBII-85 snoRNA was also detectable by northern blot in all ages of PWS-IC<sup>+del</sup> mice (Fig. 2B). These results were unexpected because our previous data indicated that these genes were completely silenced following paternal inheritance of the PWS-IC deletion (20). Low-level expression of *Snrpn* is surprising because the RT-PCR amplifies sequences removed

**Table 1.** Percentage survival of PWS-IC<sup>+/-del</sup> mice. Heterozygous PWS-IC<sup>del</sup> males on the C57BL/6J strain background were mated to FVB/NJ, C57BL/6J, (C57BL/6J × FVB/NJ)<sub>F1</sub> (B6FVBF<sub>1</sub>) and (C57BL/6J × C3H/HeJ)<sub>F1</sub> (B6C3F<sub>1</sub>) females.

| Maternal strain     | Number of PWS-IC <sup>+/-del</sup> mice born | Number of PWS-IC <sup>+/-del</sup> survivors | Percentage survival |
|---------------------|----------------------------------------------|----------------------------------------------|---------------------|
| C57BL/6J            | 75                                           | 0                                            | 0                   |
| FVB/NJ              | 51                                           | 30                                           | 59                  |
| B6C3F <sub>1</sub>  | 56                                           | 5                                            | 9                   |
| B6FVBF <sub>1</sub> | 102                                          | 10                                           | 10                  |

Wild-type littermates were culled before 2 days of age. Survival represents the percentage of mutants which survived to 21 days of age.

by the PWS-IC deletion, indicating that *Snrpn* is being expressed from the maternal chromosome.

As low-level expression of paternal genes had not been previously observed in pups of C57BL/6J mothers, we tested the hypothesis that residual expression could mitigate the severe lethality phenotype associated with paternal inheritance of the PWS-IC deletion. Northern blot, RT-PCR and real-time quantitative PCR (qPCR) were used to study expression of *Ndn*, *Snrpn* and MBII-85 in total brain RNA from PWS-IC<sup>+/-del</sup> pups born to mothers of survival non-permissive (C57BL/6J and DBA/2J) and permissive (FVB/NJ, BALB/cJ, C3H/HeJ and 129S1/Sv) strains. Northern blot and RT-PCR showed low-level expression of *Ndn*, *Snrpn* and MBII-85 in all strains (Fig. 3A) including non-permissive strains. In addition, qPCR analysis showed that these genes were expressed at a very low level compared with wild-type expression levels (Fig. 3B and C). The amplification plots for *Ndn* expression showed that it was expressed with similar kinetics in PWS-IC<sup>+/-del</sup> pups from all strains (Fig. 3B), and expression was generally <1% of wild-type expression levels (Fig. 3C). While there was some variability both within and between strains, there was no correlation with differences in survival. On the other hand, *Snrpn* expression was higher in offspring from C57BL/6J mothers (0.5% of wild-type), while all other strains expressed with similar kinetics (<0.07% of wild-type). The data suggests that the low-level expression of PWS transcripts does not play a role in strain-dependent survival of PWS-IC deletion mice. It is interesting to note that although *Snrpn* expression most originate from the maternal chromosome, expression is most evident with C57BL/6J mothers, suggesting some relaxation of imprinting in this strain.

As there is some evidence of maternal expression of *Snrpn*, we sought to determine whether maternal expression contributed to low-level expression of *Ndn*. FVB/NJ females were mated with wild-type males from the B6.CAST.c7 strain, congenic for a region of *Mus musculus castaneus* chromosome 7 on a C57BL/6J background. The reciprocal mating was also performed. Total brain RNA was isolated from (FVB/NJ × B6.CAST.c7)<sub>F1</sub> or (B6.CAST.c7 × FVB/NJ)<sub>F1</sub> mice at birth. The parental origin of *Ndn* expression was distinguished by RT-PCR and restriction digestion to detect an expressed *Ava*II polymorphism between *domesticus* and *castaneus* alleles. Both crosses demonstrate that expression is paternal

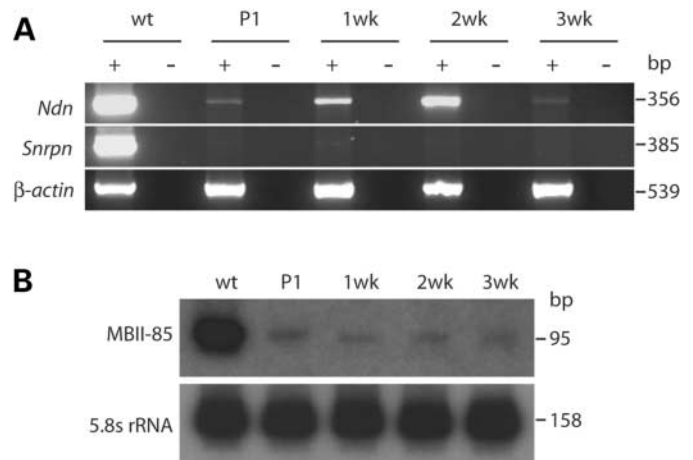

**Figure 2.** Low-level expression of paternal genes in PWS-IC<sup>+/-del</sup> offspring of FVB/NJ mothers is not age-dependent. PWS-IC<sup>+/-del</sup> offspring from FVB/NJ × PWS-IC<sup>del</sup> matings were sacrificed within 24 h of birth (P1) and at 1, 2 and 3 weeks of age. A wild-type littermate was sacrificed at P1. Total brain RNA was prepared and subjected to RT-PCR (*Ndn* and *Snrpn*) or northern analysis (MBII-85). (A) Expression of *Ndn* is clearly detectable in PWS-IC<sup>+/-del</sup> mice by RT-PCR. Detection of expression is variable between animals but does not appear to correlate with age. *Snrpn* expression is barely detectable in mutant animals by RT-PCR.  $\beta$ -actin was used as an amplification control, and no RT controls were performed for each amplification. (B) MBII-85 was analyzed by northern blot with 5.8S rRNA as a loading control. Comparable low-level expression is observed at all ages.

in origin (Fig. 4A). B6.CAST.c7 females were also mated with PWS-IC<sup>del/+</sup> males, and parental expression of *Ndn* in (B6.CAST.c7 × PWS-IC<sup>del</sup>)<sub>F1</sub> pups was analyzed using the same polymorphism. Although *Ndn* expression was limited to the paternal *domesticus* allele in wild-type pups, expression in pups that had inherited the PWS-IC<sup>del</sup> allele paternally was biallelic, representing both *domesticus* and *castaneus* alleles (Fig. 4B). This indicates that a low level of maternal expression is only observed or detectable in the absence of an active paternal PWS-IC.

#### Evidence for a maternal genetic factor influencing survival

The most likely interpretation of these results is that survival does not correlate with residual transcription of PWS genes. The current evidence supports the existence of a modifier locus that influences survival in PWS-IC<sup>+/-del</sup> mice. The inability to successfully foster mutant offspring between strains also points to the involvement of genetic factors. This is further supported by the decreased survival observed in crosses with F<sub>1</sub> mothers. C57BL/6J (non-permissive) and FVB/NJ or C3H/HeJ (both permissive) F<sub>1</sub> mothers produced significantly fewer surviving offspring than FVB/NJ mothers (Table 1).

As reported here and previously (20), crosses between C57BL/6J females and PWS-IC<sup>del/+</sup> males on the 129S1/Sv background generate B6129SF<sub>1</sub> offspring that never survive beyond 7 days of age ( $n = 30$  litters, no PWS-IC<sup>+/-del</sup> mice survived, 53 dead pups with confirmed PWS-IC<sup>+/-del</sup> genotype). In contrast, in this study, we have shown that the reciprocal cross between a 129S1/Sv female and a PWS-IC<sup>del/+</sup> male on the C57BL/6J background produces 129SB6F<sub>1</sub> offspring that can



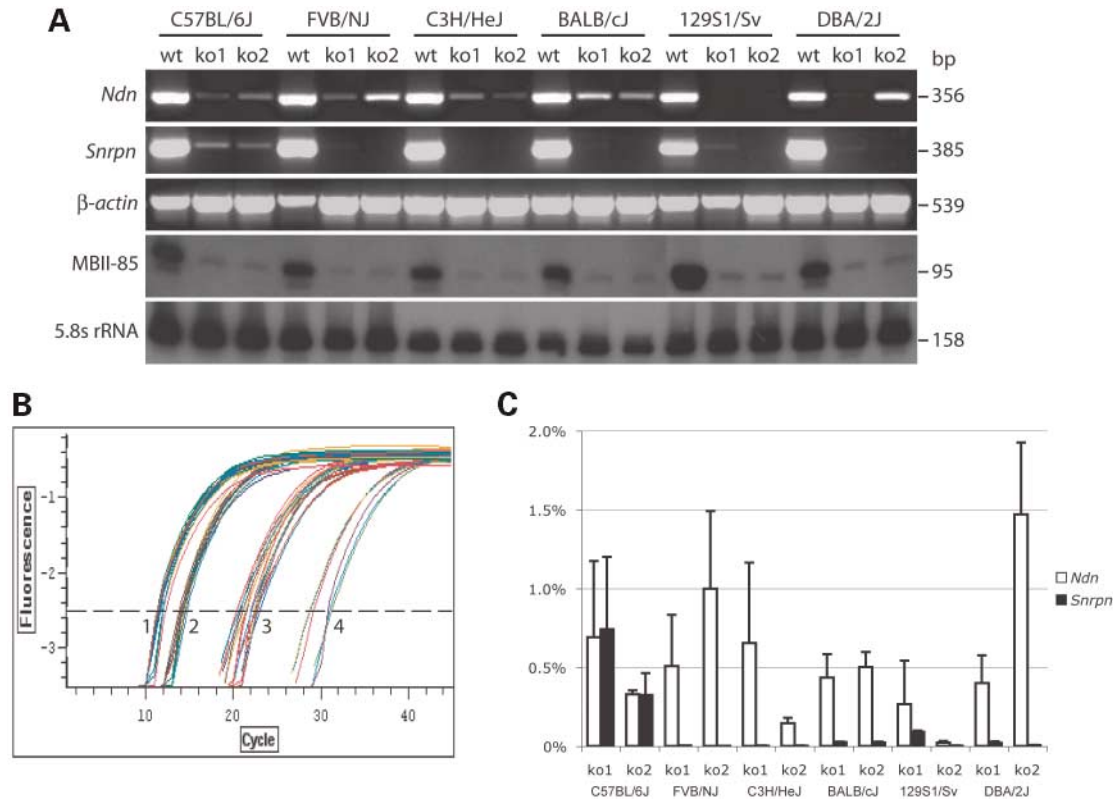

**Figure 3.** Low-level gene expression does not correlate with strain-dependent differences in survival. Heterozygous PWS-IC<sup>del</sup> males were mated with C57BL/6J, FVB/NJ, C3H/HeJ, Balb/cJ, DBA/2J or 129/Sv females. Total RNA was prepared from the brains of two PWS-IC<sup>del</sup> mice (ko) and one wild-type (wt) littermate from each cross. (A) *Ndn* and *Snrpn* expression were analyzed by RT-PCR using  $\beta$ -actin as an amplification control. *Ndn* expression is detected in PWS-IC<sup>del</sup> mice on all strain backgrounds. While detection of expression shows some variation between animals, expression differences do not correlate with survival as non-permissive strains (C57BL/6J and DBA/2J) also show low-level expression. MBII-85 was analyzed by northern blot using 5.8S rRNA as a loading control. Comparable low-level expression is observed on all strain backgrounds. (B) A representative qPCR plot showing amplification of *Ndn*, *Snrpn* and  $\beta$ -actin in offspring from survival non-permissive (C57BL/6J) and permissive (FVB/NJ) maternal strains. Reactions were performed in triplicate. The amplification classes are: 1.  $\beta$ -actin amplification of all samples; 2. *Ndn* and *Snrpn* amplification in wild-type pups from both maternal strains; 3. *Ndn* amplification in PWS-IC<sup>del</sup> pups from both maternal strains and *Snrpn* amplification in PWS-IC<sup>del</sup> pups from C57BL/6J mothers; 4. amplification of *Snrpn* in PWS-IC<sup>del</sup> offspring from FVB/NJ mothers. Amplification profiles for *Ndn* were similar in PWS-IC<sup>del</sup> pups from all other maternal strains, and *Snrpn* profiles in other strains were comparable to FVB/NJ. (C) Graphical representation of relative expression levels in mutants. Mutant expression levels relative to wild-type were calculated for each strain using the  $2^{-\Delta\Delta C_t}$  method (38,39), normalized against  $\beta$ -actin. Reactions were performed in triplicate and the data is an average of three independent experiments. Expression is graphed as a percentage of wild-type expression levels.

survive ( $n = 2$  litters, 2 PWS-IC<sup>del</sup> mice survived) when the wild-type sibs are culled. While the offspring from these crosses are genetically identical, the effects on survival are not. The results indicate that survival of PWS-IC<sup>del</sup> pups is dependent upon the maternal strain.

## DISCUSSION

Heterozygous PWS-IC<sup>del</sup> males bred to C57BL/6J or DBA/2J females produce mutant offspring that do not survive until weaning, even if wild-type siblings are removed to reduce competition. However, long-term survival of PWS-IC<sup>del</sup> mice was achieved with mothers from several other strains, including FVB/NJ, C3H/HeJ, 129S1/Sv and BALB/cJ. On all of these strains, surviving PWS-IC<sup>del</sup> mice are significantly smaller than wild-type littermates. Unlike affected children, they do not become obese on a standard diet, both males and females are fertile, and they appear to be grossly

normal in all other respects. The absence of an obesity phenotype in PWS-IC<sup>del</sup> mice is perplexing, since obesity is a major component of the PWS phenotype in humans. There may be significant physiological differences between humans and mice in this respect. Alternatively, the failure to thrive phenotype may be relatively severe and may not subside sufficiently to permit PWS-IC<sup>del</sup> mice to become obese on a standard diet. Behavioral studies of adult PWS-IC<sup>del</sup> mice are currently underway.

Expression analysis of *Ndn*, *Snrpn* and MBII-85 snoRNA reveals residual expression of these imprinted genes in PWS-IC<sup>del</sup> mice, which was not previously observed (20). The original mutation was on a 129S1/Sv strain background. Altered transcription may be a reflection of relaxation of imprinting as the mutation has been progressively backcrossed to the C57BL/6 strain. Originally detected in PWS-IC<sup>del</sup> pups from FVB/NJ mothers, this expression is also present at comparable levels in pups from all other maternal strains, including C57BL/6J and DBA/2J, which do not support

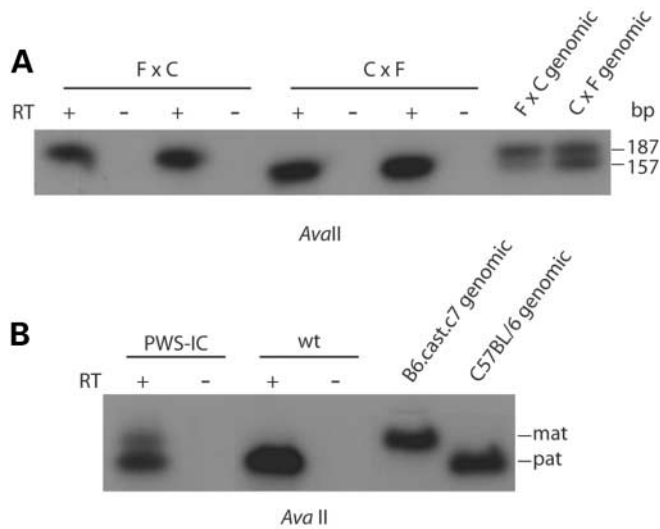

**Figure 4.** Residual gene expression is biallelic in PWS-IC<sup>+/del</sup> pups. RT-PCR was performed on total brain RNA and parental alleles were distinguished by *Ava*II digestion, which cuts the *M. musculus domesticus* (FVB/NJ and C57BL/6J) allele twice and the *M. musculus castaneus* (B6.CAST.c7) allele once. The products detected are 187 bp (*castaneus*) and 157 bp (*domesticus*). (A) Analysis of *Ndn* expression in reciprocal crosses between wild-type FVB/NJ (F) and B6.CAST.c7 (C) mice shows that expression is always from the paternally inherited chromosome (paternal strain is listed second). (B) Analysis of *Ndn* expression in crosses between B6.CAST.c7 females and heterozygous PWS-IC<sup>+/del</sup> males shows that in wild-type offspring expression is paternal in origin, but in PWS-IC<sup>+/del</sup> offspring expression occurs from both paternal and maternal alleles. The PWS-IC<sup>+/del</sup> lane contains 10 times more input RNA and a 10-fold greater exposure time than the wt lane.

survival. This suggests that the increased survival of PWS-IC<sup>+/del</sup> pups is not a direct result of the low-level expression of genes in the PWS region.

Previous data indicated that, in the absence of the PWS-IC, the paternal chromosome is completely repressed (20). In this study, we detect low-level expression from the paternal chromosome in PWS-IC<sup>+/del</sup> mice. The PWS-IC is required for the establishment and maintenance of expression of the upstream genes (26), which lie more than 1 Mb away from the IC. Expression of *Ndn* could reflect residual expression in the absence of enhancers or other elements normally present in the PWS-IC. The parental origin of MBII-85 expression is unknown. Although expression could be maternal in origin, it could also arise from the paternal chromosome. In humans, the main promoter for MBII-85 expression is believed to be the *SNRPN* promoter (17,27). Although the *Snrpn* promoter is physically deleted in PWS-IC<sup>+/del</sup> mice, transcription could initiate at alternative upstream exons of *Snrpn*, which are associated with much weaker expression than the major promoter (28,29).

Residual expression originates, in part, from the normally repressed, maternal chromosome. However, this expression is only detectable when the paternal PWS-IC is deleted. It is possible that the maternal allele normally produces a few transcripts, but these are not detectable in the presence of abundant paternal transcripts. An alternative explanation might be that the maternal chromosome is only active in the absence of the paternal PWS-IC. This would require a

*trans* effect where the PWS-IC<sup>del</sup> allele causes deregulation of the maternal allele allowing low-level transcription from the maternal chromosome. *Trans* effects have only rarely been documented in mice (30). There are rare reports of normally repressed genes being expressed in PWS individuals with maternal UPD or a paternal 15q11–q13 deletion (31,32) suggesting in rare cases that there may also be some relaxation of imprinting in humans allowing expression from the maternal chromosome.

Why do PWS-IC<sup>+/del</sup> pups survive on some strains and not others, when low-level expression occurs in all strains? While we have not excluded the possibility that a temporal or spatial variation in expression could account for survival, our data support the existence of modifier loci that influence the survival of affected pups. Heterozygous males on the 129S1/Sv genetic background bred to C57BL/6J females produce PWS-IC<sup>+/del</sup> pups that never survive. Conversely, carrier males on the C57BL/6J genetic background bred with 129S1/Sv females produce PWS-IC<sup>+/del</sup> pups that are capable of surviving to adulthood, even though the genetic background is identical. The evidence suggests that the maternal strain dictates survival. This could be due to differences in the uterine environment or slight differences in gestation time, which affects the ability of pups to survive. This possibility could be tested by embryo transfer. An alternative explanation is that the modifier gene or genes responsible for survival of PWS-IC<sup>+/del</sup> mice are required in the oocyte. A third explanation could be that the modifier gene or genes are also imprinted. Pronuclear transplantation, in which pronuclei from a (C57BL/6J × PWS-IC<sup>del</sup>)F<sub>1</sub> oocyte are moved into enucleated fertilized FVB/NJ or (FVB/NJ × PWS-IC<sup>del</sup>)F<sub>1</sub> oocytes, could be used to distinguish between these two possibilities (33,34). If the transplanted pronuclei give rise to pups that are able to survive, then the modifier gene is most likely oocyte specific; however, if the resultant pups still do not survive, then the modifying gene is most likely imprinted.

Strain-specific differences have previously been implicated in phenotypic variation seen in *Ndn*-deficient mice (23–25). One report documented increased survival with FVB/N mothers as compared with C57BL/6 mothers (24), and a second suggested increased penetrance as the contribution of the C57BL/6 genetic background increased (25), suggesting a role for modifier genes influencing the *Ndn*-deficient phenotype. Our data supports the existence of modifier loci affecting the penetrance of postnatal lethality in PWS-IC<sup>+/del</sup> mice. Furthermore, we have demonstrated that the modifier gene or genes are maternal in origin. Both studies show that penetrance of postnatal lethality is increased on the C57BL/6 background. Is the modifying effect on the PWS-IC<sup>+/del</sup> mice the same as that seen in *Ndn*-deficient mice? The contribution of individual genes to the PWS phenotype in mice remains unclear. Postnatal lethality in *Ndn*-deficient mice occurs within the first 30 h (24,25) and is reported to be due to a deficiency in central respiratory drive (35). UPD, deletion and PWS-IC deletion mouse models of PWS show survival up to 8 days. The rate of early postnatal lethality is only documented for PWS-IC deletion mice, with 72% dying within 48 h (20). Initial lethality may be caused by respiratory failure due to *Ndn* deficiency, and mice making it through this phase

subsequently die from other causes. Identification of modifier loci will help in understanding the individual gene contribution to the PWS phenotypes in mice.

Mouse models of PWS, including the PWS-IC deletion mouse, demonstrate a severe failure to thrive phenotype that usually results in fully penetrant postnatal lethality. This lethality precludes the use of these mouse models to study the late-onset features of PWS. The survival of PWS-IC<sup>+/del</sup> mice reported here will allow us to assess whether these mice have obesity and behavioral phenotypes, and to what extent the mouse is a model for the later clinical features associated with PWS. This study demonstrates that strain background affects the phenotype of PWS-IC<sup>+/del</sup> mice and long-term survival of these mice can be achieved on certain strain backgrounds by culling wild-type sibs. Furthermore, we have shown that low-level expression occurs from both alleles in PWS-IC<sup>+/del</sup> mice and is not correlated with increased survival. The findings demonstrate that genetic modifiers specific to the maternal strain influence the ability of PWS-IC<sup>+/del</sup> mice to survive.

## MATERIALS AND METHODS

### Mouse strains

The strains of mice used in this study were C57BL/6J, FVB/NJ, C3H/HeJ, DBA/2J, Balb/cJ (The Jackson Laboratory) and 129S1/Sv. A C57BL/6J strain congenic for a region of *M. musculus castaneus* chromosome 7 (B6.CAST.c7) was also used (36). PWS-IC deletion mice were generated on a 129S1/Sv background (20,29) and were backcrossed to a C57BL/6J background (>10 backcross generations). Unless otherwise stated, the PWS-IC<sup>del</sup> strain used is C57BL/6J. In all crosses, the female strain is listed first and the male strain second, as is conventional. Mice were fed Pico-Vac mouse diet (Purina Mills, LLC).

### Culling and fostering

Within 2 days of birth, it is generally possible to distinguish PWS-IC<sup>+/del</sup> mice from their wild-type littermates. Wild-type pups were removed from the litter within 2 days, except one that was left to stimulate milk production. Mice were fostered by removing the PWS-IC<sup>+/del</sup> pups from one mother (usually from the C57BL/6J strain) and giving them to the other mother (usually from the FVB/NJ strain) whose pups had been removed. Additionally, urine from the foster mother was wiped on the foster pups to aid in her acceptance of the new pups.

### RT-PCR

Total RNA was isolated from whole brains obtained from neonatal, 1-, 2- and 3-week-old mice. RNA was extracted using RNAzol (Tel-Test) according to the manufacturer's instructions. RNA (10 µg) was pretreated with DNase I (Roche) and half of the RNA was reverse-transcribed (RT) with random hexamers using Superscript II (Invitrogen). The other half of the RNA was manipulated in parallel in the absence of enzyme. One-twentieth of the reactions was used

to seed PCR with *Taq* polymerase (Roche) for 30 cycles of 94°C for 30 s, 60°C for 45 s and 72°C for 45 s, using the following primers. Ndn 9F (5'-GTATCCCAAATCCACAG TGC-3'), Ndn10R (5'-CTTCCTGTGCCAGTTGAAGT-3'), Snrpn N1.1 (5'-CTGAGGAGTGATTGCAACGC-3'), Snrpn N2.2 (5'-CAAGATCCTTAATACTCGGG-3'), β-actin F (5'-GTGGGCCGCTCTAGGCACCAA-3') and β-actin R (5'-CTCTTTGATGTCACGCACGATTTC-3').

### Northern blot analysis

Total RNA was separated on 8% acrylamide–7 M urea gels and transferred to nylon membranes (Hybond N+, Amersham) using a semi-dry blotting apparatus (*Trans-blot* SD, BioRad) as described by Cavaille *et al.* (14). RNA was fixed to the membrane by baking at 80°C in a vacuum oven. The membranes were hybridized overnight at 58°C, according to Church and Gilbert (37). Oligonucleotides for MBII-85 (5'-TTCCGA TGAGAGTGGCGGTACAGA-3') and 5.8S rRNA (5'-TCC TGCAATTCACATTAATTCTCGCAGCTAGC-3') were end-labeled using γ<sup>32</sup>P-ATP (Perkin–Elmer) and T4 polynucleotide kinase (Invitrogen). Probes were purified from free nucleotides using the nucleotide removal kit (QIAGEN). Membranes were washed twice for 15 min at room temperature in 2 × SSC, 0.1% SDS, and exposed to Kodak XAR film at –80°C for 4–36 h.

### qPCR

qPCR reactions were performed with the Dynamo Hot Start SYBR Green qPCR kit (MJResearch) on an Opticon Monitor II (MJResearch) according to instructions. Cycling conditions were 95°C for 15 min followed by 40 cycles of 94°C for 10 s, 60°C for 30 s and 72°C for 30 s, using the following primer sets: Ndn (5'-GGGACTGATGATCTGTAT CG-3' and 5'-CTTCCTGTGCCAGTTGAAGT-3'), Snrpn (5'-GGAGTGATTTGCAACGCAATG-3' and 5'-AGGCTGT CCTTCGACGTTTG-3') and β-actin (5'-TGTGACGTTGAC ATCCGTAAA-3' and 5'-CCACCGATCCACACAGAGTA-3'). RT+/- reactions were amplified initially to check efficiencies of RT reactions and screen for genomic DNA contamination. Samples were amplified in triplicate. Raw C<sub>T</sub> values were obtained using Opticon Monitor II software. Relative expression levels were calculated using the 2<sup>-ΔΔC<sub>T</sub></sup> method (38,39) and analysis was performed in Microsoft Excel.

### Allele-specific expression

A polymorphic *Ava* II site between *M. musculus castaneus* and *M. musculus domesticus* was used to distinguish allele-specific expression of *Ndn* (M. Mann and M.S. Bartolomei, unpublished data). RT-PCR was performed on total brain RNA with NdnpolyF (5'-ACAAAGTAAGGACCTGAGCGACC-3') and NdnpolyR (5'-CAACATCTTCTATCCGTTCTTCG-3') resulting in a product of 200 bp. *Ava* II generates products of 187 and 13 bp from *castaneus* and 157, 30 and 13 bp from *domesticus*. PCR products were digested overnight with *Ava* II, resolved on 4.8% agarose gels, Southern blotted and hybridized with <sup>32</sup>P-labeled PCR product.



## ACKNOWLEDGEMENTS

The authors wish to thank Edwin Peery and Chris Futtner for helpful discussions and critical reading of the manuscript. This work was supported by a grant from the National Institutes of Health to C.I.B. (R01 HD37872). This article is dedicated to the memory of Cami Brannan.

## REFERENCES

- Holm, V.A., Cassidy, S.B., Butler, M.G., Hanchett, J.M., Greenswag, L.R., Whitman, B.Y. and Greenberg, F. (1993) Prader–Willi syndrome: consensus diagnostic criteria. *Pediatrics*, **91**, 398–402.
- Nicholls, R.D., Saitoh, S. and Horsthemke, B. (1998) Imprinting in Prader–Willi and Angelman syndromes. *Trends Genet.*, **14**, 194–200.
- Jiang, Y., Lev-Lehman, E., Bressler, J., Tsai, T.F. and Beaudet, A.L. (1999) Genetics of Angelman syndrome. *Am. J. Hum. Genet.*, **65**, 1–6.
- Brannan, C.I. and Bartolomei, M.S. (1999) Mechanisms of genomic imprinting. *Curr. Opin. Genet. Dev.*, **9**, 164–170.
- Ohta, T., Gray, T.A., Rogan, P.K., Buiting, K., Gabriel, J.M., Saitoh, S., Muralidhar, B., Bilienska, B., Krajewska-Walasek, M., Driscoll, D.J. et al. (1999) Imprinting-mutation mechanisms in Prader–Willi syndrome. *Am. J. Hum. Genet.*, **64**, 397–413.
- Buiting, K., Lich, C., Cottrell, S., Barnicoat, A. and Horsthemke, B. (1999) A 5-kb imprinting center deletion in a family with Angelman syndrome reduces the shortest region of deletion overlap to 880 bp. *Hum. Genet.*, **105**, 665–666.
- Nicholls, R.D. and Knepper, J.L. (2001) Genome organization, function, and imprinting in Prader–Willi and Angelman syndromes. *Annu. Rev. Genom. Hum. Genet.*, **2**, 153–175.
- Jong, M.T., Gray, T.A., Ji, Y., Glenn, C.C., Saitoh, S., Driscoll, D.J. and Nicholls, R.D. (1999) A novel imprinted gene, encoding a RING zinc-finger protein, and overlapping antisense transcript in the Prader–Willi syndrome critical region. *Hum. Mol. Genet.*, **8**, 783–793.
- Boccaccio, I., Glatt-Deeley, H., Watrin, F., Roeckel, N., Lalande, M. and Muscatelli, F. (1999) The human *MAGEL2* gene and its mouse homologue are paternally expressed and mapped to the Prader–Willi region. *Hum. Mol. Genet.*, **8**, 2497–2505.
- MacDonald, H.R. and Wevrick, R. (1997) The *necdin* gene is deleted in Prader–Willi syndrome and is imprinted in human and mouse. *Hum. Mol. Genet.*, **6**, 1873–1878.
- Glenn, C.C., Porter, K.A., Jong, M.T., Nicholls, R.D. and Driscoll, D.J. (1993) Functional imprinting and epigenetic modification of the human *SNRPN* gene. *Hum. Mol. Genet.*, **2**, 2001–2005.
- Reed, M.L. and Leff, S.E. (1994) Maternal imprinting of human *SNRPN*, a gene deleted in Prader–Willi syndrome. *Nat. Genet.*, **6**, 163–167.
- Wevrick, R., Kerns, J.A. and Francke, U. (1994) Identification of a novel paternally expressed gene in the Prader–Willi syndrome region. *Hum. Mol. Genet.*, **3**, 1877–1882.
- Cavaillé, J., Buiting, K., Kiefman, M., Lalande, M., Brannan, C.I., Horsthemke, B., Bachelier, J.-P., Brosius, J. and Hüttenhofer, A. (2000) Identification of brain-specific and imprinted small nucleolar RNA genes exhibiting an unusual genomic organization. *Proc. Natl Acad. Sci. USA*, **97**, 14311–14316.
- de los Santos, T., Schweizer, J., Rees, C.A. and Francke, U. (2000) Small evolutionarily conserved RNA, resembling C/D box small nucleolar RNA, is transcribed from the *PWCR1*, a novel imprinted gene in the Prader–Willi deleted region, which is highly expressed in the brain. *Am. J. Hum. Genet.*, **67**, 1067–1082.
- Rougeulle, C., Cardoso, C., Fontés, M., Colleaux, L. and Lalande, M. (1998) An imprinted antisense RNA overlaps *UBE3A* and a second maternally expressed transcript. *Nat. Genet.*, **19**, 15–16.
- Runte, M., Hüttenhofer, A., Gross, S., Kiefmann, M., Horsthemke, B. and Buiting, K. (2001) The IC-*SNURF-SNRPN* transcript serves as a host for multiple small nucleolar RNA species and as an antisense RNA for *Ube3a*. *Hum. Mol. Genet.*, **10**, 2687–2700.
- Cattanach, B.M., Barr, J.A., Evans, E.P., Burtenshaw, M., Beechey, C.V., Leff, S.E., Brannan, C.I., Copeland, N.G., Jenkins, N.A. and Jones, J. (1992) A candidate mouse model for Prader–Willi syndrome which shows an absence of *Snrpn* expression. *Nat. Genet.*, **2**, 270–274.
- Gabriel, J.M., Merchant, M., Ohta, T., Ji, Y., Caldwell, R.G., Ramsey, M.J., Tucker, J.D., Longnecker, R. and Nicholls, R.D. (1999) A transgene insertion creating a heritable chromosome deletion mouse model of Prader–Willi and Angelman syndromes. *Proc. Natl Acad. Sci. USA*, **96**, 9258–9263.
- Yang, T., Adamson, T.E., Resnick, J.L., Leff, S., Wevrick, R., Francke, U., Jenkins, N.A., Copeland, N.G. and Brannan, C.I. (1998) A mouse model for Prader–Willi syndrome imprinting-centre mutations. *Nat. Genet.*, **19**, 25–31.
- Lee, S., Kozlov, S., Hernandez, L., Chamberlain, S.J., Brannan, C.I., Stewart, C.L. and Wevrick, R. (2000) Expression and imprinting of *MAGEL2* suggest a role in Prader–Willi syndrome and the homologous murine imprinting phenotype. *Hum. Mol. Genet.*, **9**, 1813–1819.
- Tsai, T.F., Jiang, Y.H., Bressler, J., Armstrong, D. and Beaudet, A.L. (1999) Paternal deletion from *Snrpn* to *Ube3a* in the mouse causes hypotonia, growth retardation, and partial lethality and provides evidence for a gene contributing to Prader–Willi syndrome. *Hum. Mol. Genet.*, **8**, 1357–1364.
- Tsai, T.F., Armstrong, D. and Beaudet, A.L. (1999) *Necdin*-deficient mice do not show lethality or the obesity and infertility of Prader–Willi syndrome. *Nat. Genet.*, **22**, 15–16.
- Gérard, M., Hernandez, L., Wevrick, R. and Stewart, C.L. (1999) Disruption of the mouse *necdin* gene results in early post-natal lethality. *Nat. Genet.*, **23**, 199–202.
- Muscatelli, F., Arous, D.N., Massacrier, A., Boccaccio, I., Le Moal, M., Cau, P. and Cremer, H. (2000) Disruption of the mouse *Necdin* gene results in hypothalamic and behavioral alterations reminiscent of the human Prader–Willi syndrome. *Hum. Mol. Genet.*, **9**, 3101–3110.
- Bielinska, B., Blydes, S.M., Buiting, K., Yang, T., Krajewska-Walasek, M., Horsthemke, B. and Brannan, C.I. (2000) *De novo* deletions of *SNRPN* exon 1 in early human and mouse embryos result in a paternal to maternal imprint switch. *Nat. Genet.*, **25**, 74–78.
- Runte, M., Kroisel, P.M., Gillessen-Kaesbach, G., Varon, R., Horn, D., Cohen, M.Y., Wagstaff, J., Horsthemke, B. and Buiting, K. (2004) *SNURF-SNRPN* and *UBE3A* transcript levels in patients with Angelman syndrome. *Hum. Genet.*, **114**, 553–561.
- Bressler, J., Tsai, T., Ramirez, M., Armstrong, D. and Beaudet, A. (2001) The *SNRPN* promoter is not required for genomic imprinting of the Prader–Willi/Angelman domain in mice. *Nat. Genet.*, **28**, 232–240.
- Landers, M., Bancescu, D.L., Le Meur, E., Rougeulle, C., Glatt-Deeley, H., Brannan, C., Muscatelli, F. and Lalande, M. (2004) Regulation of the large (approximately 1000 kb) imprinted murine *Ube3a* antisense transcript by alternative exons upstream of *Snrnf/Snrpn*. *Nucleic Acids Res.*, **32**, 3480–3492.
- Herman, H., Lu, M., Anggraini, M., Sikora, A., Chang, Y., Yoon, B.J. and Soloway, P.D. (2003) *Trans* allele methylation and paramutation-like effects in mice. *Nat. Genet.*, **34**, 199–202.
- Rogan, P.K., Seip, J.R., White, L.M., Wenger, S.L., Steele, M.W., Sperling, M.A., Menon, R. and Knoll, J.H. (1998) Relaxation of imprinting in Prader–Willi syndrome. *Hum. Genet.*, **103**, 694–701.
- Muralidhar, B., Marney, A. and Butler, M.G. (1999) Analysis of imprinted genes in subjects with Prader–Willi syndrome and chromosome 15 abnormalities. *Genet. Med.*, **1**, 141–145.
- Latham, K.E. (1994) Strain-specific differences in mouse oocytes and their contributions to epigenetic inheritance. *Development*, **120**, 3419–3426.
- Latham, K. and Sapienza, C. (1998) Localization of genes encoding egg modifiers of paternal genome function to mouse chromosomes one and two. *Development*, **125**, 929–935.
- Ren, J., Lee, S., Pagliardini, S., Gérard, M., Stewart, C.L., Greer, J.J. and Wevrick, R. (2003) Absence of *Ndn*, encoding the Prader–Willi syndrome-deleted gene *necdin*, results in congenital deficiency of central respiratory drive in neonatal mice. *J. Neurosci.*, **23**, 1569–1573.
- Wakeland, E.K., Morel, L., Achey, K., Yui, M. and Longmate, J. (1997) Speed congenics: a classic technique in the fast lane (relatively speaking). *Immunol. Today*, **18**, 472–477.
- Church, G.M. and Gilbert, W. (1985) The genomic sequencing technique. *Prog. Clin. Biol. Res.*, **177**, 17–21.
- Pfaffl, M.W. (2001) A new mathematical model for relative quantification in real-time RT–PCR. *Nucleic Acids Res.*, **29**, e45.
- Livak, K.J. and Schmittgen, T.D. (2001) Analysis of relative gene expression data using real-time quantitative PCR and the 2(-Delta Delta C(T)) method. *Methods*, **25**, 402–408.
